# Supplementary material for: Cationic cyclotriveratrylene-based glycoconjugate and its interaction with fullerene
Source: Royal Society of Chemistry journal article supplement (doi:10.1039/c3ra40432c), 2013-01-01
Supplement: c3ra40432c.pdf [file c3ra40432c.pdf]

*ESI for*

## **Cationic Cyclotrimeratrylene-Based Glycoconjugate and Its Interaction with Fullerene**

Li-Juan Feng,<sup>a,b</sup> Hui Li,<sup>a</sup> Qi Chen,<sup>\*a</sup> Bao-Hang Han<sup>\*a</sup>

<sup>a</sup> *National Center for Nanoscience and Technology, Beijing 100190, China*

<sup>b</sup> *Department of Chemistry, Zunyi Medical College (Zhuhai Campus), Zhuhai 519041,*

*China*

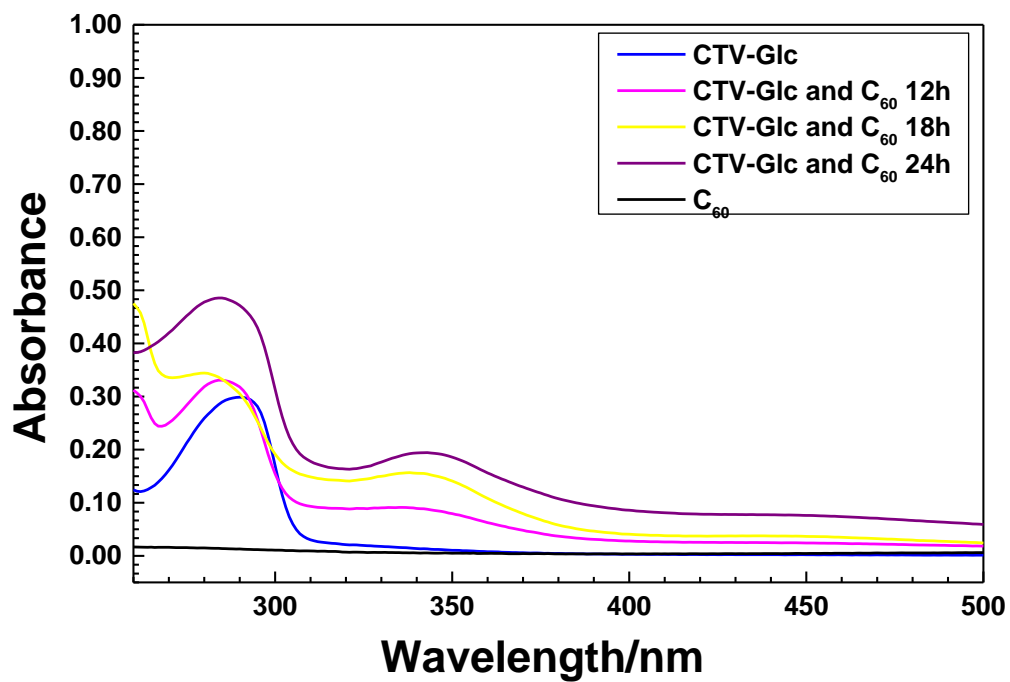

**Fig. S1** Absorption spectra of aqueous **CTV-Glc**, **CTV-Glc** with **C<sub>60</sub>**, and **C<sub>60</sub>** in water

(concentration of **CTV-Glc** is  $5.0 \times 10^{-5}$  M).

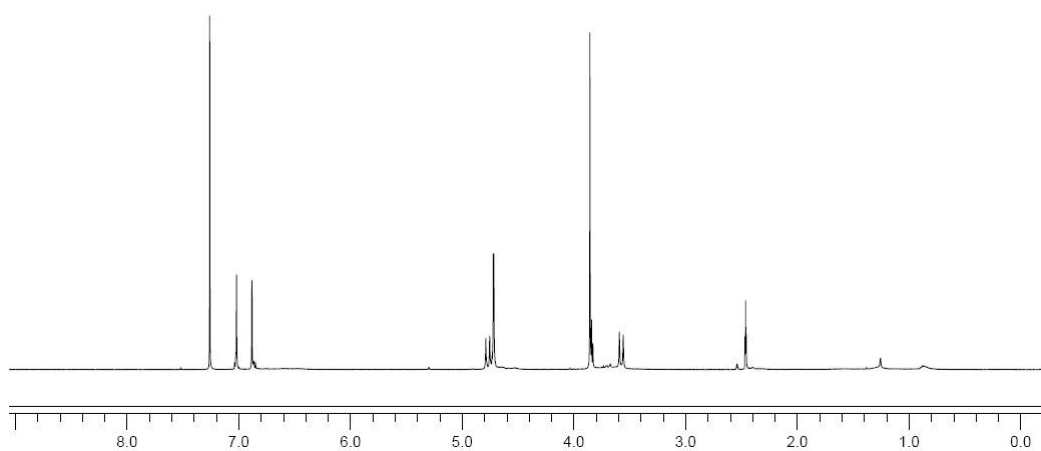

$^1\text{H}$  NMR spectrum of **2**

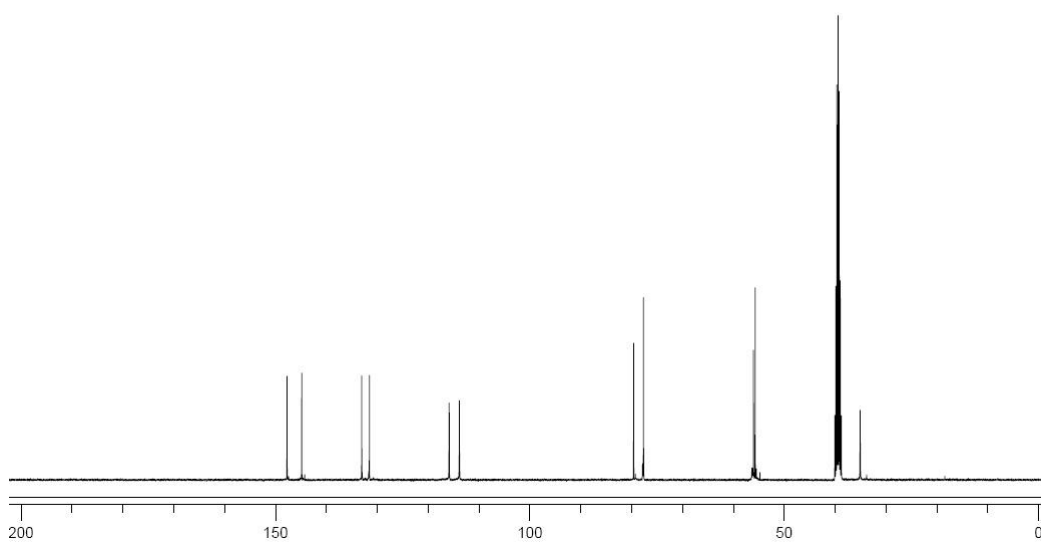

$^{13}\text{C}$  NMR spectrum of **2**

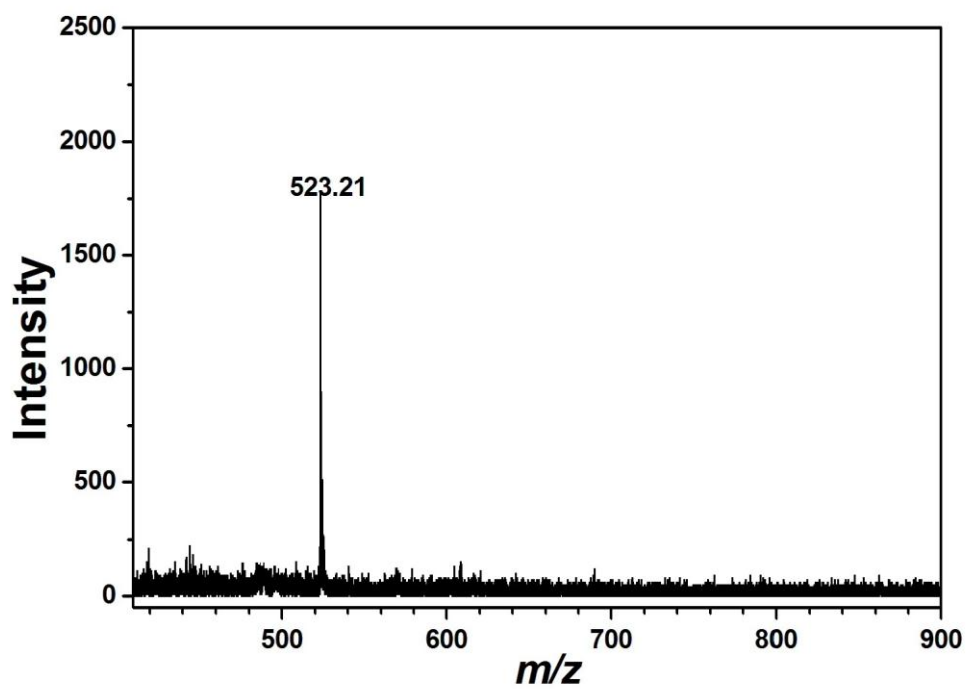

MS spectrum of 2

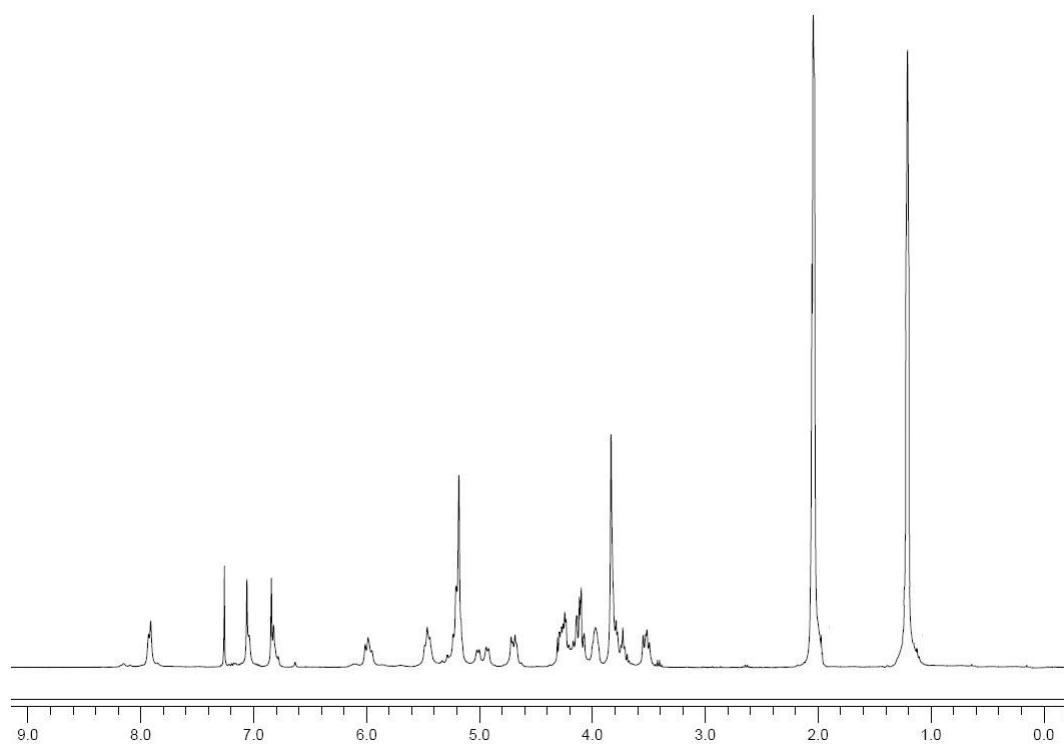

$^1\text{H}$  NMR spectrum of **5**

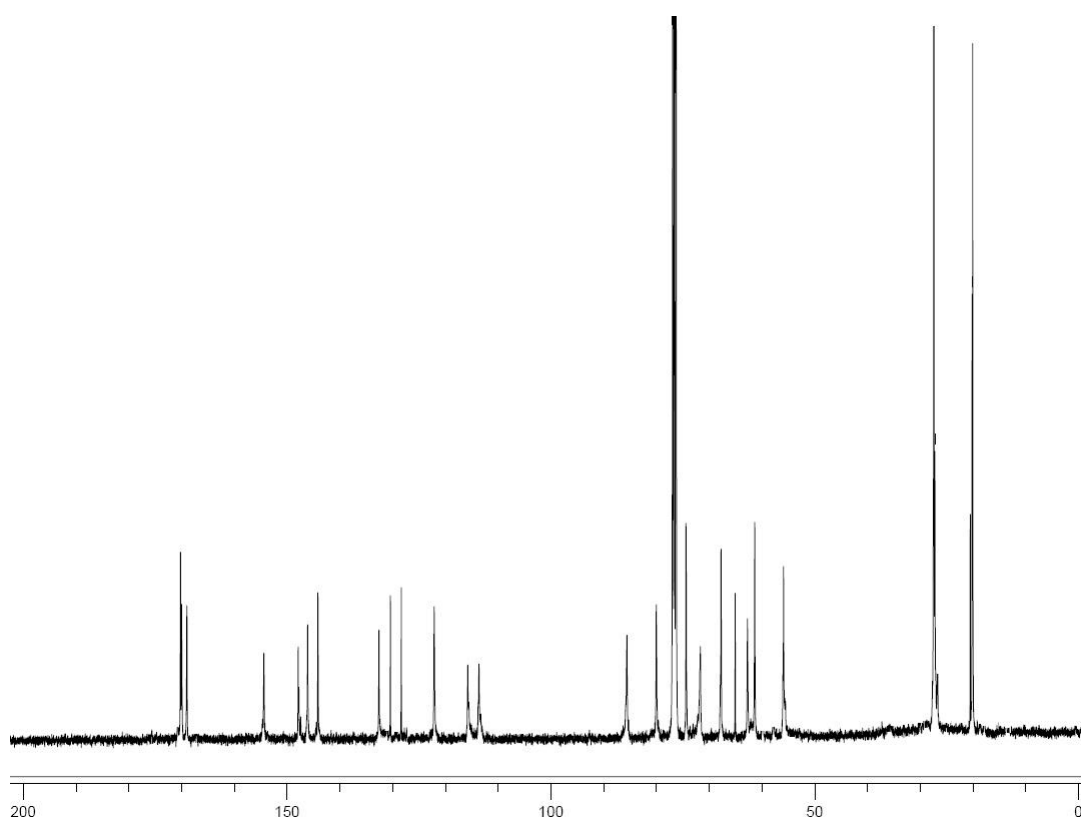

$^{13}\text{C}$  NMR spectrum of **5**

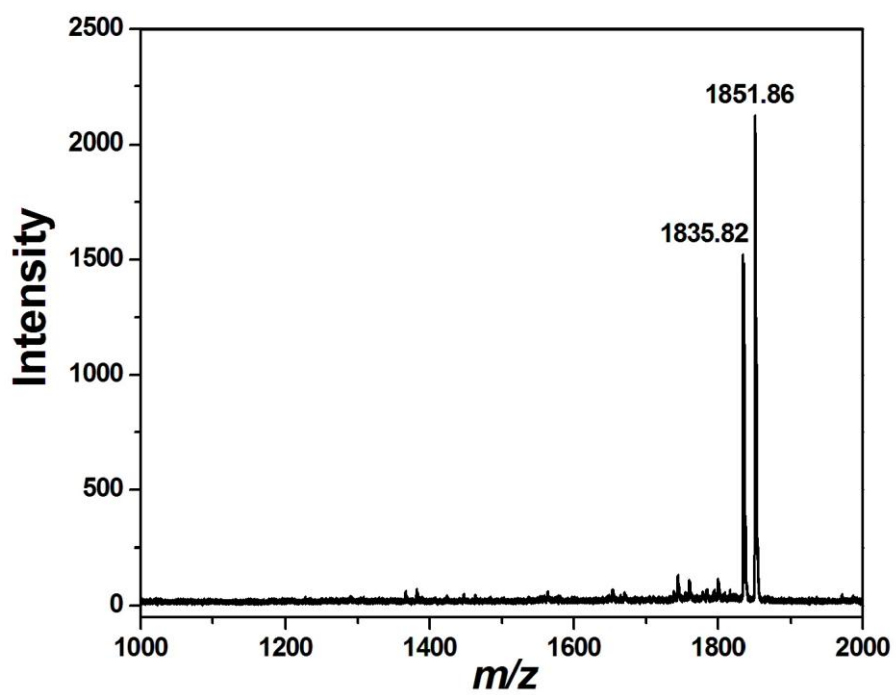

MS spectrum of 5

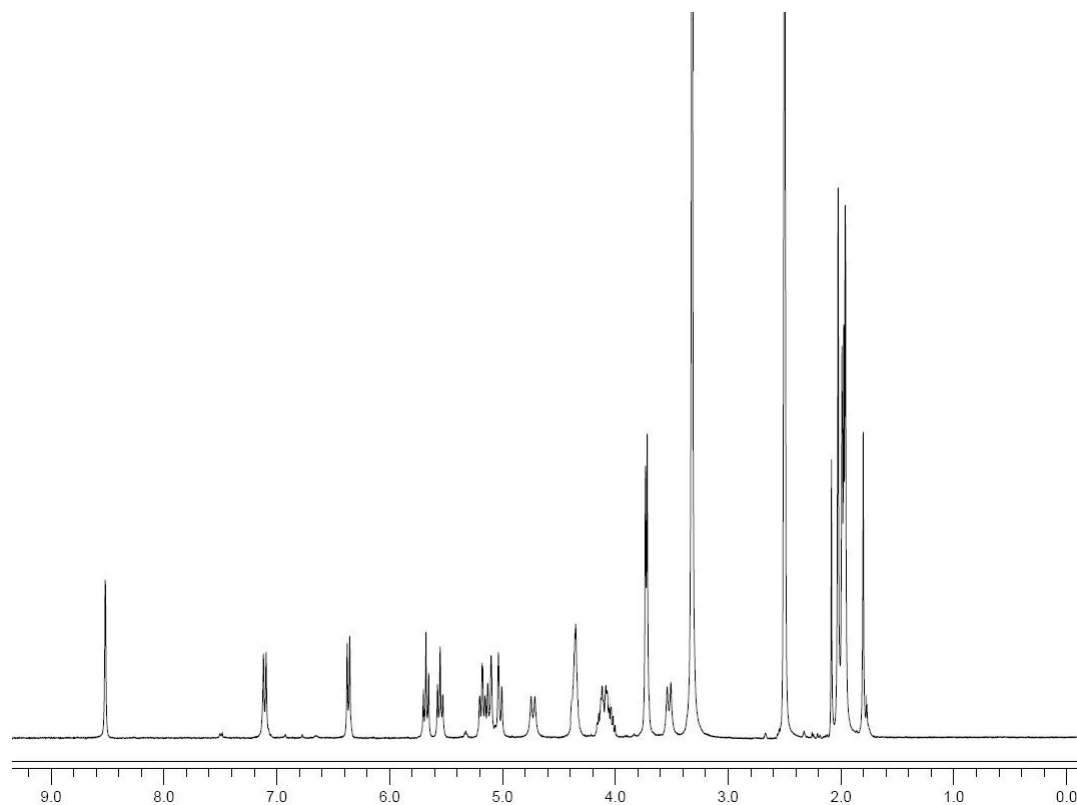

$^1\text{H}$  NMR spectrum of **6**

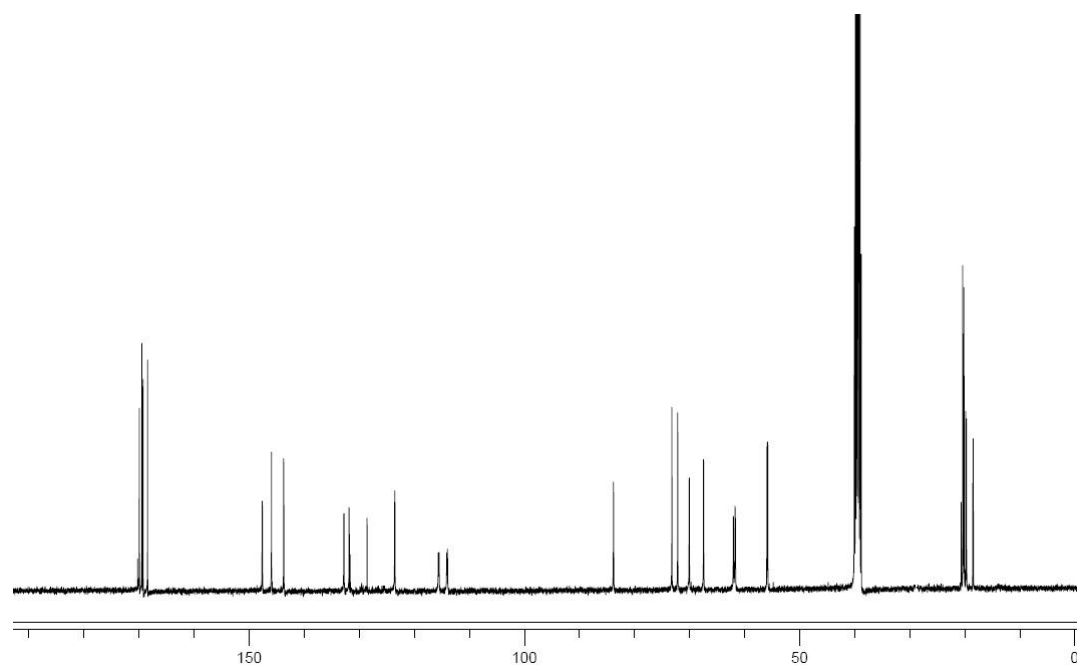

$^{13}\text{C}$  NMR spectrum of **6**

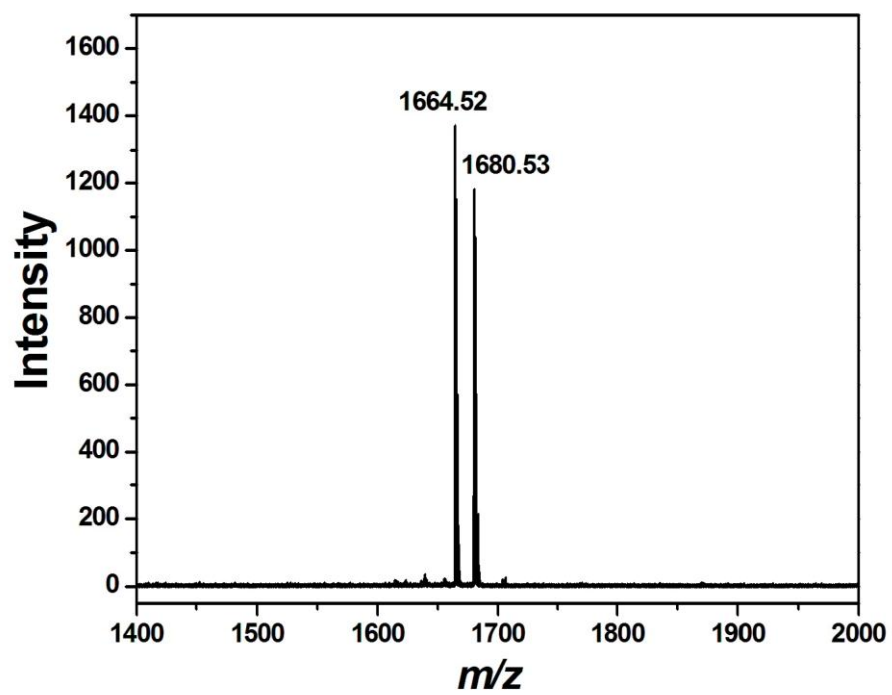

MS spectrum of **6**



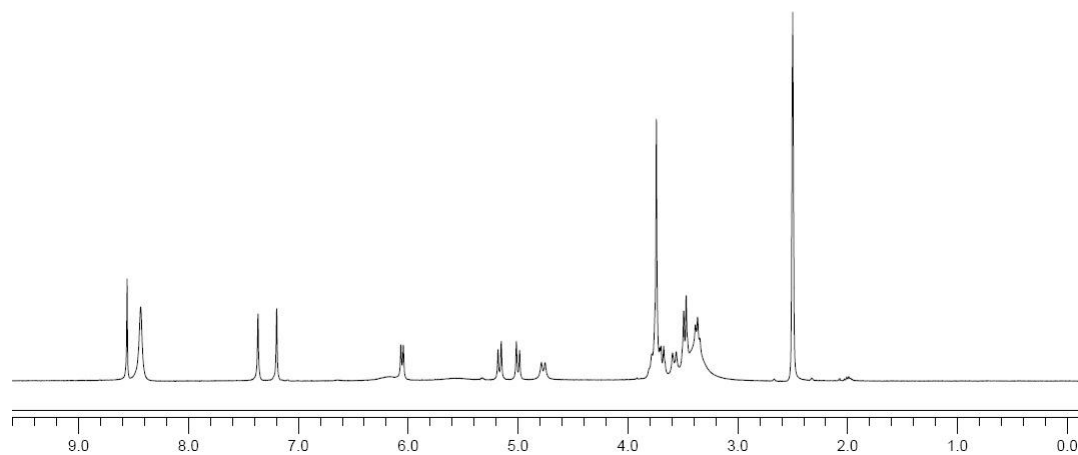

$^1\text{H}$  NMR spectrum of CTV-GH

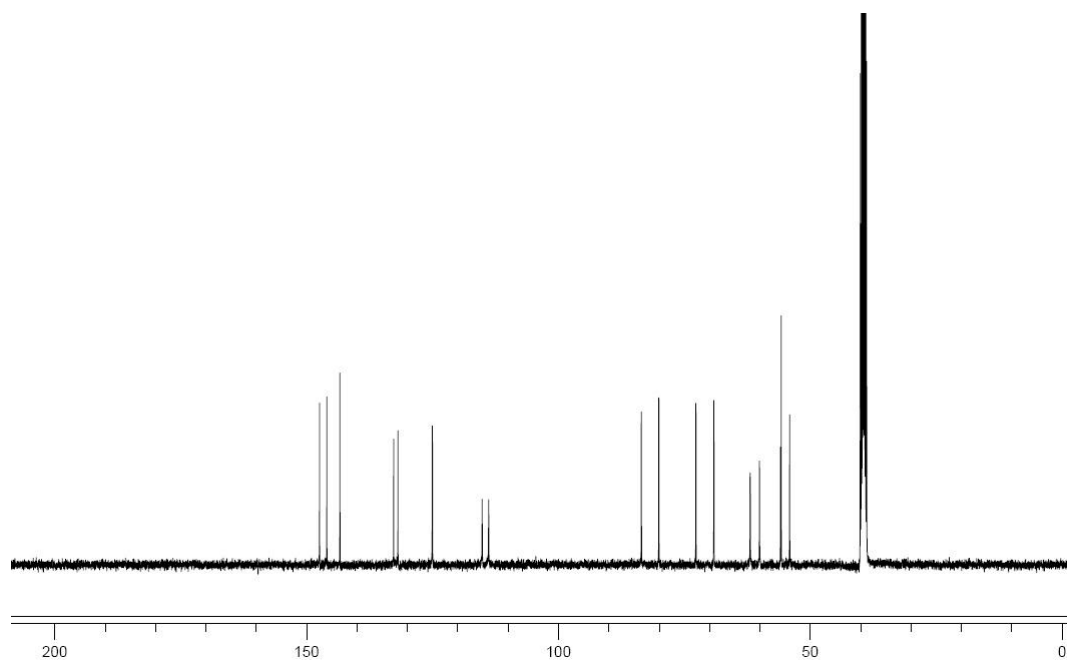

$^{13}\text{C}$  NMR spectrum of CTV-GH

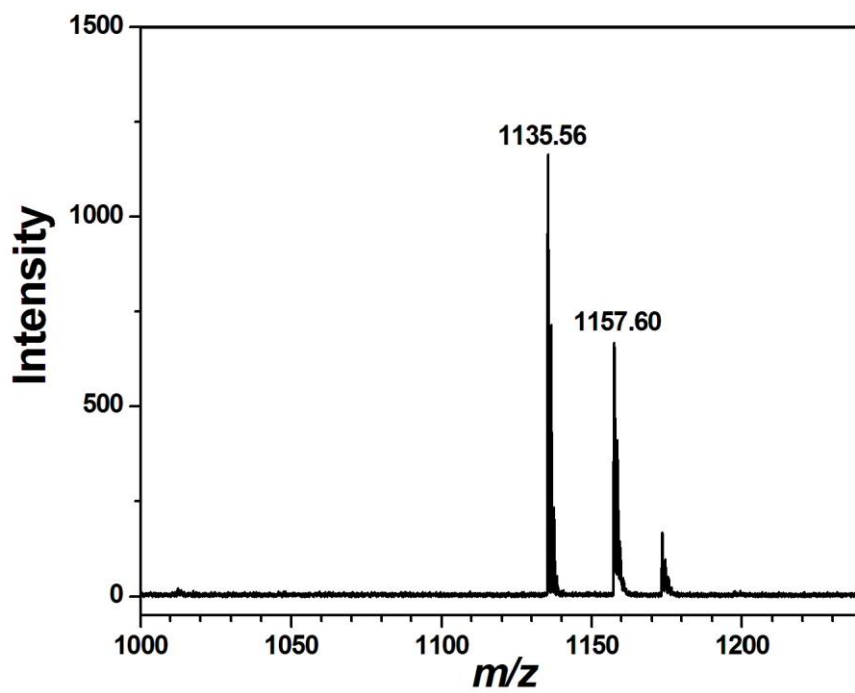

MS spectrum of CTV-GH

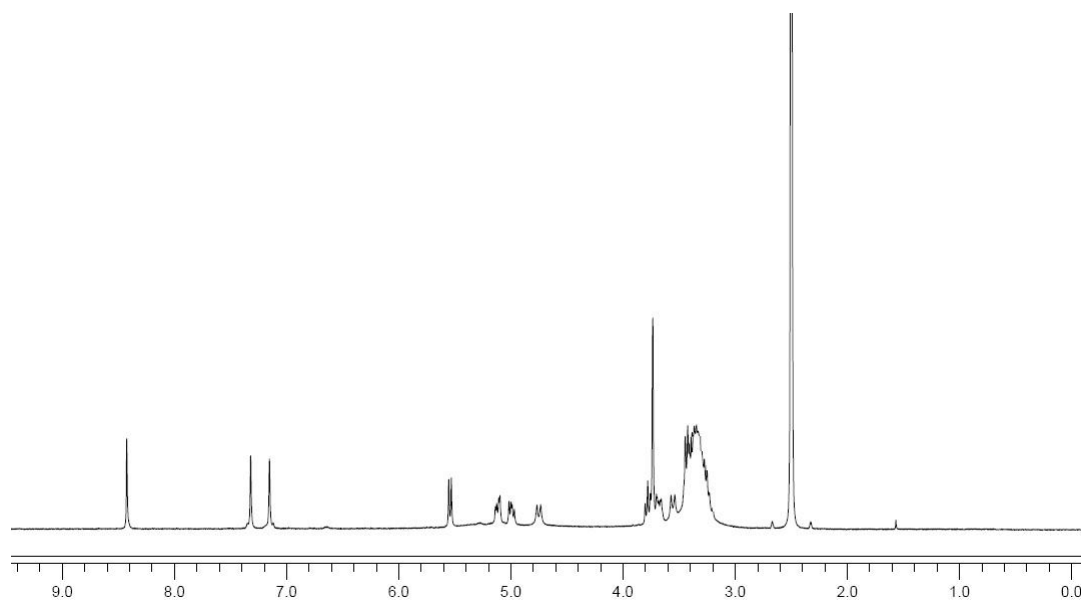

$^1\text{H}$  NMR spectrum of **CTV-Glc**

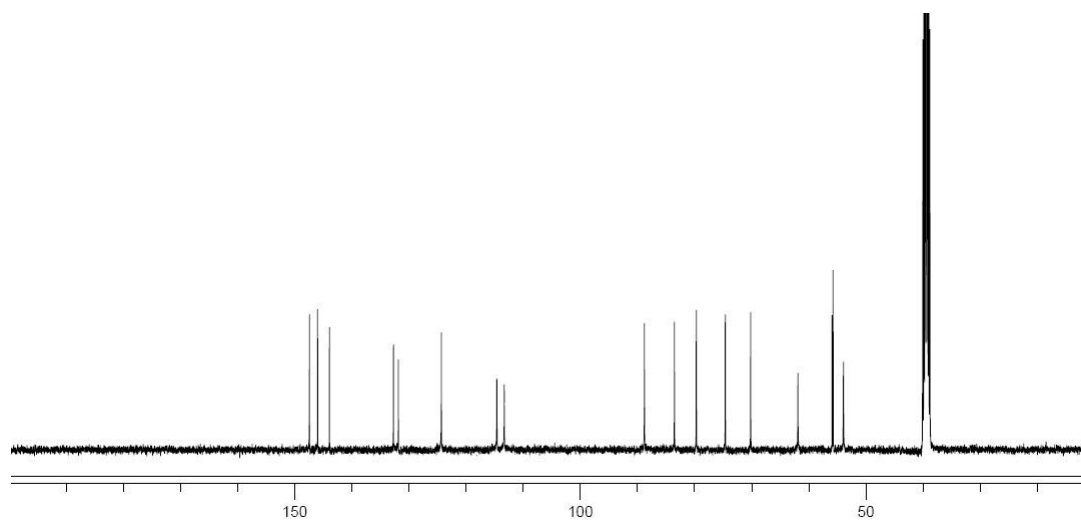

$^{13}\text{C}$  NMR spectrum of **CTV-Glc**

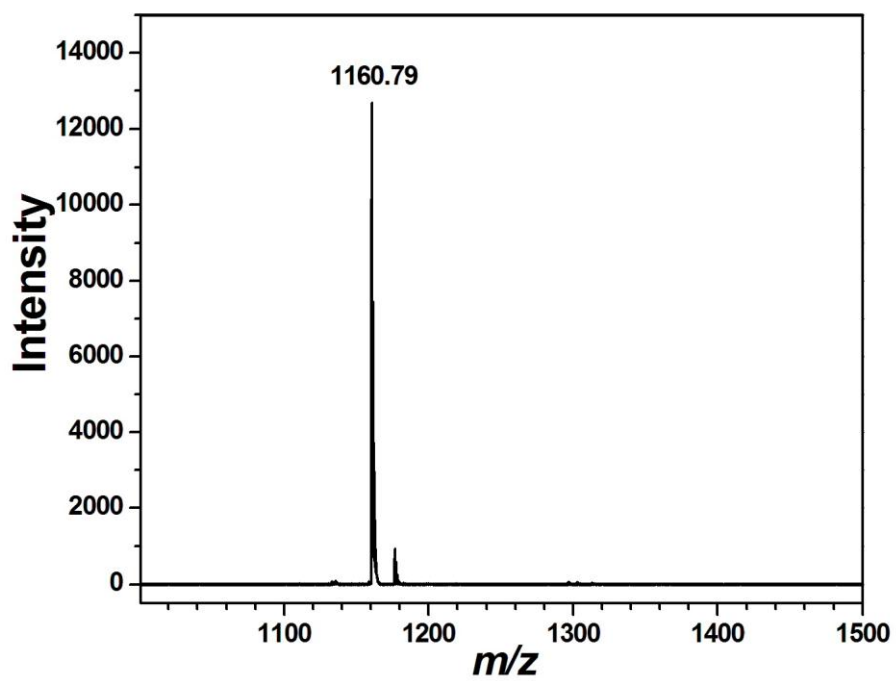

MS spectrum of CTV-Glc
